# Supplementary material for: Laparoscopic Nissen fundoplication versus 90° and 180° fundoplication for gastroesophageal reflux disease
Source: Springer Nature journal article supplement (doi:10.1007/s10353-021-00745-5), 2022-01-26
Supplement: MOESM1 [file 20070758]

Appendix. Search strategy

| MEDLINE (Ovid) | |
| --- | --- |
| Date of search: 2017-09-08  Number of hits: 522  Date of search: 2019-09-13  Number of hits: 566. Limit 40 to yr="2017 -Current": 66  Date of search: 2020-04-14  Number of hits: 589. Limit 40 to dt=”20190912 – 20200414”: 15 | Field tags:  .fs. = Floating sub-heading  .pt. = Publication type  .ti,ab, kf. = Title, abstract & keyword heading word  / = MeSH, not exploded  exp / = MeSH, exploded |
| 1. exp Gastroesophageal Reflux/  2. (GER* or GOR* or Barrett*).ti,ab,kf.  3. ((gastro* or oesophag* or esophag* or disease*) adj2 reflux*).ti,ab,kf.  4. 1 or 2 or 3  5. exp Laparoscopy/  6. (laparoscop* or abdominoscop* or celioscop* or peritoneoscop*).ti,ab,kf.  7. 5 or 6  8. exp Fundoplication/  9. (fundoplicat* or nissen* or rosetti* or rossetti* or dor* or toupet*).ti,ab,kf.  10. (fund* adj2 wrap*).ti,ab,kf.  11. 8 or 9 or 10  12. 4 and 7 and 11  13. (ae or to or po or co).fs.  14. (safe or safety).ti,ab.  15. side effect$.ti,ab.  16. ((adverse or undesirable or harms$ or serious or toxic) adj3 (effect$ or reaction$ or event$ or outcome$)).ti,ab.  17. exp product surveillance, postmarketing/  18. exp adverse drug reaction reporting systems/  19. exp clinical trials, phase iv/  20. exp poisoning/  21. exp substance-related disorders/  22. exp drug toxicity/  23. exp abnormalities, drug induced/  24. exp drug monitoring/  25. exp drug hypersensitivity/  26. (toxicity or complication$ or noxious or tolerability).ti,ab.  27. exp Postoperative Complications/  28. exp Intraoperative Complications/  29. or/13-28  30. 12 and 29  31. randomized controlled trial.pt.  32. controlled clinical trial.pt.  33. randomized.ab.  34. placebo.ab.  35. drug therapy.fs.  36. randomly.ab.  37. trial.ab.  38. groups.ab.  39. or/31-38  40. 39 and 30 | |

| Embase | |
| --- | --- |
| Date of search: 2017-09-07  Number of hits: 739  Date of search: 2019-09-13  Number of hits: 804. [2017-2019]/py: 165  Date of search: 2020-04-14  Number of hits: 837. #39 AND [13-9-2019]/sd NOT [15-4-2020]/sd: 42 | Field tags:  :ti,ab = Title & abstract  /exp = Emtree term, exploded  /de = Exact Emtree heading |
| #1 'gastroesophageal reflux'/exp  #2 (ger* OR gor* OR barrett*):ab,ti  #3 ((gastro* OR oesophag* OR esophag* OR disease*) NEAR/2 reflux*):ab,ti  #4 #1 or #2 or #3  #5 'laparoscopy'/exp  #6 (laparoscop* OR abdominoscop* OR celioscop* OR peritoneoscop*):ab,ti  #7 #5 or #6  #8 'fundoplication'/exp  #9 (fundoplicat* OR nissen* OR rosetti* OR rossetti* OR dor* OR toupet*):ab,ti  #10 (fund* NEAR/2 wrap*):ab,ti  #11 #8 or #9 or #10  #12 #4 and #7 and #11  #13 (safe OR safety):ti,ab  #14 (side NEXT/1 effect*):ti,ab  #15 ((adverse OR undesirable OR harms* OR serious OR toxic) NEAR/3 (effect* OR reaction* OR event* OR outcome*)):ti,ab  #16 'postmarketing surveillance'/exp  #17 'drug surveillance program'/exp  #18 'phase 4 clinical trial (topic)'/exp  #19 'intoxication'/exp  #20 'addiction'/exp  #21 'drug toxicity'/exp  #22 'congenital malformation'/exp  #23 'drug monitoring'/exp  #24 'dress syndrome'/exp  #25 'drug hypersensitivity'/exp  #26 (toxicity OR complication* OR noxious OR tolerability):ti,ab  #27 'postoperative complication'/exp  #28 'peroperative complication'/exp  #29 #13 OR #14 OR #15 OR #16 OR #17 OR #18 OR #19 OR #20 OR #21 OR #22 OR #23 OR #24 OR #25 OR #26 OR #27 OR #28  #30 'control group'/de  #31 'controlled study'/exp  #32 'double blind procedure'/de  #33 'single blind procedure'/de  #34 'randomized controlled trial'/exp  #35 'triple blind procedure'/de  #36 (case* NEAR/2 (control* OR comparison*)):ab,ti  #37 ('control group*' OR 'controlled stud*' OR 'double blind' OR 'single blind' OR 'triple blind' OR randomized OR randomised OR randomly OR placebo OR trial*):ab,ti  #38 #30 OR #31 OR #32 OR #33 OR #34 OR #35 OR #36 OR #37  #39 #12 AND #29 AND #38 | |

| CINAHL (Ebsco) | |
| --- | --- |
| Date of search: 2017-09-08  Number of hits: 21  Date of search: 2019-09-13  Number of hits: 150. [2017-2019]/py: 36  Date of search: 2020-04-14  Number of hits: 177. Limiters - Published Date: 20190901-: 11 | Field tags:  AB = Abstract  MH = Cinahl subject heading  MH+ = Cinahl subject heading, exploded  TI = Title |
| S1. (MH "Gastroesophageal Reflux")  S2. TI(GER* OR GOR* or Barrett* OR AB(GER* OR GOR* OR Barrett*)  S3. TI((gastro* OR oesophag* OR esophag* OR disease*) AND reflux*)) OR AB(gastro* OR oesophag* OR esophag* OR disease*) N2 reflux*)))  S4. S1 OR S2 OR S3  S5. (MH "Laparoscopy")  S6. TI(laparoscop* or abdominoscop* or celioscop* or peritoneoscop*) OR AB(laparoscop* or abdominoscop* or celioscop* or peritoneoscop*)  S7. S5 or S6  S8. (MH "Fundoplication")  S9. TI(fundoplicat* or nissen* or rosetti* or rossetti* or dor* or toupet*) OR AB(fundoplicat* or nissen* or rosetti* or rossetti* or dor* or toupet*)  S10. TI(fund* N2 wrap*) OR AB(fund* N2 wrap*)  S11. S8 OR S9 OR S10  S12. (MH "Postoperative Complications+")  S13. (MH "Intraoperative Complications+")  S14. TI((adverse or undesirable or harms* or serious) N3 (effect* or reaction* or event* or outcome*)) OR AB(((adverse or undesirable or harms* or serious) N3 (effect* or reaction* or event* or outcome*))))  S15. TI("side effect*") OR AB("side effect*")  S16. TI(safe or safety) OR AB(safe or safety)  S17. S12 OR S13 OR S14 OR S15 OR S16  S18. ((MH "Random Assignment") or (MH "Random Sample+") or (MH "Crossover Design") or (MH "Clinical Trials+") or (MH "Comparative Studies") or (MH "Control (Research)+") or (MH "Control Group") or (MH "Factorial Design") or (MH "Quasi-Experimental Studies+") or (MH "Placebos") or (MH "Meta Analysis") or (MH "Sample Size") or (MH "Research, Nursing") or (MH "Research Question") or (MH "Research Methodology+") or (MH "Evaluation Research+") or (MH "Concurrent Prospective Studies") or (MH "Prospective Studies") or (MH "Nursing Practice, Research-Based") or (MH "Solomon Four-Group Design") or (MH "One-Shot Case Study") or (MH "Pretest-Posttest Design+") or (MH "Static Group Comparison") or (MH "Study Design") or (MH "Clinical Research+") ) or ( clinical nursing research or random* or cross?over or placebo* or control* or factorial or sham* or meta?analy* or systematic review* or blind* or mask* or trial*) S19. S4 AND S7 AND S11 AND S17 AND S18 | |

| Cochrane Library (Wiley) | |
| --- | --- |
| Date of search: 2017-09-07  Number of hits: 146; Cochrane Reviews (4), Trials (128), Other Reviews (7), Economic Evaluations (7)  Date of search: 2019-09-13  Number of hits: Cochrane Reviews (4), Cochrane Protocols (1), Trials (148). 2017-2019: Cochrane Reviews (0), Cochrane Protocols (0), Trials (26)  Date of Search: 2020-04-14  Number of hits: Cochrane Reviews (4), Cochrane Protocols (1), Trials (120). 2019-2020: Cochrane Reviews (0), Cochrane Protocols (0), Trials (3) – though 0 after 20190913 | Field tags:  :ti,ab,kw = Title, abstract & keywords |
| 1. (GER* or GOR* or Barrett):ti,ab,kw  2. ((gastro* or oesophag* or esophag* or disease*) NEAR/2 reflux*):ti,ab,kw  3. #1 OR #2  4. (laparoscop* or abdominoscop* or celioscop* or peritoneoscop*):ti,ab,kw  5. (fundoplicat* or nissen* or rosetti* or rossetti* or dor* or toupet*):ti,ab,kw  6. (fund* NEAR/2 wrap*)  7. #5 OR #6  8. #3 AND #4 AND #7  9. (safe or safety):ti,ab  10. ("side effect" or "side effects"):ti,ab  11. ((adverse or undesirable or harms* or serious or toxic) NEAR/3 (effect* or reaction* or event* or outcome*)):ti,ab  12. #9 OR #10 OR #11  16. #8 AND #15 | |

| Web of Science | |
| --- | --- |
| Date of search: 2017-09-08  Number of hits: 277  Date of search: 2019-09-13  Number of hits: 313. Refined by: PUBLICATION YEARS: (2019 OR 2018 OR 2017): 56  Date of search: 2020-04-14  Number of hits: 310. Refined by: PUBLICATION YEARS: (2019 OR 2020): 15 | Field tags:  TS = Topic |
| #1. TS=((GER* or GOR* or Barrett* or ((Gastro* or oesophag* or esophag* or disease*) and reflux*)))  #2. TS=((laparoscop* or abdominoscop* or celioscop* or peritoneoscop*))  #3. TS=((fundoplicat* or nissen* or rosetti* or rossetti* or dor* or toupet* or (fund* NEAR/2 wrap*)))  #4. TS=((safe* OR "side effect*" OR ((adverse or undesirable or harm* or serious) NEAR/3 (effect* or reaction* or event* or outcome*)) OR ((postoperat* OR intraoperat* OR peroperat*) NEAR/3 complication*)))  #5. TS=("clinical trial*" OR "research design" OR "comparative stud*" OR "evaluation stud*" OR "controlled trial*" OR random* OR placebo* OR "single blind*" OR "double blind*")  #6. #1 AND #2 AND #3 AND #4 AND #5 | |
